# Supplementary material for: Rikkunshito, a Japanese Kampo Medicine, Ameliorates Decreased Feeding Behavior via Ghrelin and Serotonin 2B Receptor Signaling in a Novelty Stress Murine Model
Source: Hindawi journal article supplement (doi:10.1155/2013/792940), 2013-01-01
Supplement: f1 [file 792940.f1.pdf]

## SUPPLEMENTAL MATERIAL:

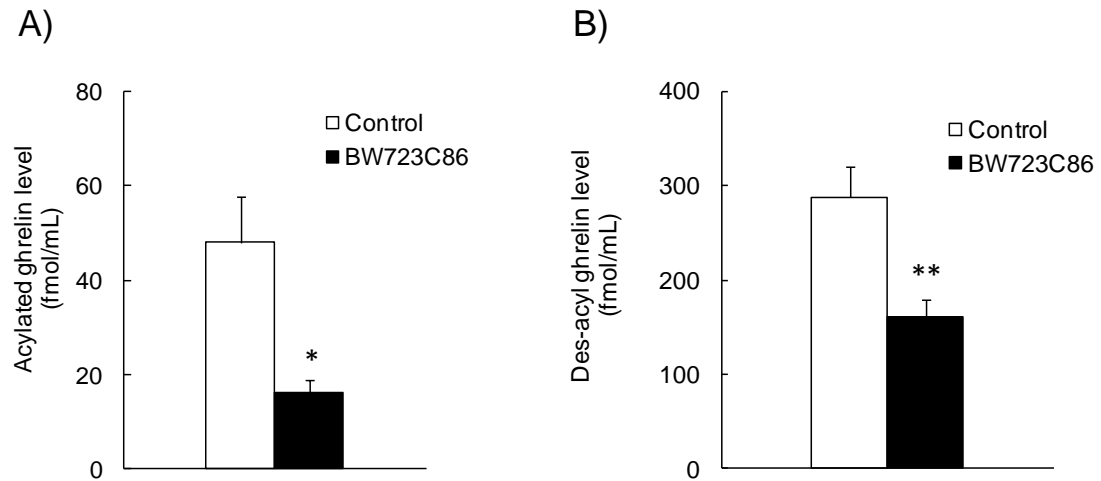***Supplemental material******Effect of BW723C86, a 5-HT<sub>2B</sub> receptor agonist on plasma acylated and des-acyl ghrelin level.***

A) The plasma acylated ghrelin level. B) The plasma des-acyl ghrelin level. BW723C86 (16 mg/kg, IP) was administered to rats and blood samples were collected 60 min after the treatment by decapitation. The control rats were administered saline IP. Data are expressed as the mean  $\pm$  SEM of 8 rats. \*,  $P < 0.05$ ; \*\*,  $P < 0.01$  vs. control by Student's  $t$ -test or Aspin-Welch's  $t$ -test.
